# Supplementary material
Source: PubMed Central journal article supplement (PMC5158308)

# Supplementary Figure 1.

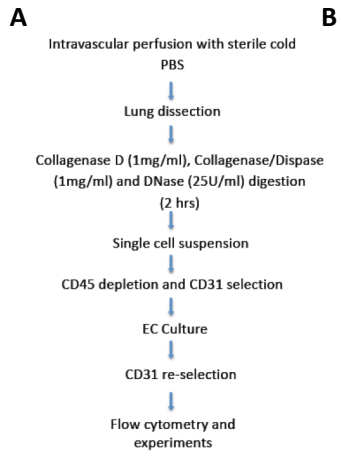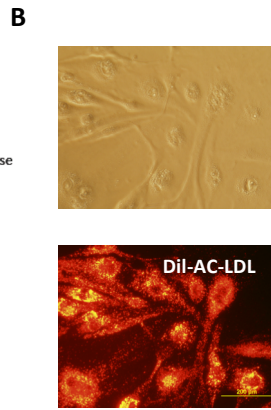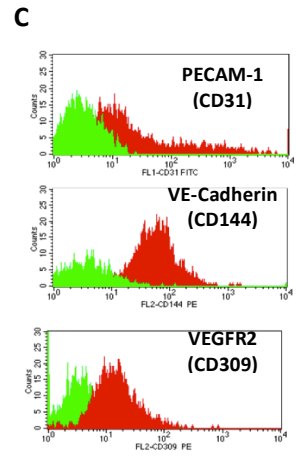

Supplement: NIHMS828040-supplement-Supplementary_Figure.pdf [file NIHMS828040-supplement-Supplementary_Figure.pdf]
